# Supplementary material for: Vacuum-assisted annealing method for high efficiency printable large-area polymer solar cell modules
Source: Royal Society of Chemistry journal article supplement (doi:10.1039/c8tc06513f), 2019-01-01
Supplement: c8tc06513f1.pdf [file c8tc06513f1.pdf]

Vacuum-assisted Annealing Method for High Efficiency Printable Large-area Polymer  
Solar Cell Modules

Wenchao Zhao, Yun Zhang, Shaoqing Zhang, Sunsun Li, Chang He, and Jianhui  
Hou\*

W. C. Zhao, Dr. Y. Zhang, Dr. S. S. Li, Dr. C. He, Prof. J. H. Hou

State Key Laboratory of Polymer Physics and Chemistry, Beijing National Laboratory  
for Molecular Sciences, Institute of Chemistry, Chinese Academy of Sciences, Beijing  
100190, P. R. China.

E-mail: hjhzlz@iccas.ac.cn

Dr. S. Q. Zhang

University of Science and Technology Beijing, School of Chemistry and Biology  
Engineering, Beijing 100083, China

W. C. Zhao, Prof. J. H. Hou

University of Chinese Academy of Sciences, Beijing 100049, P. R. China.

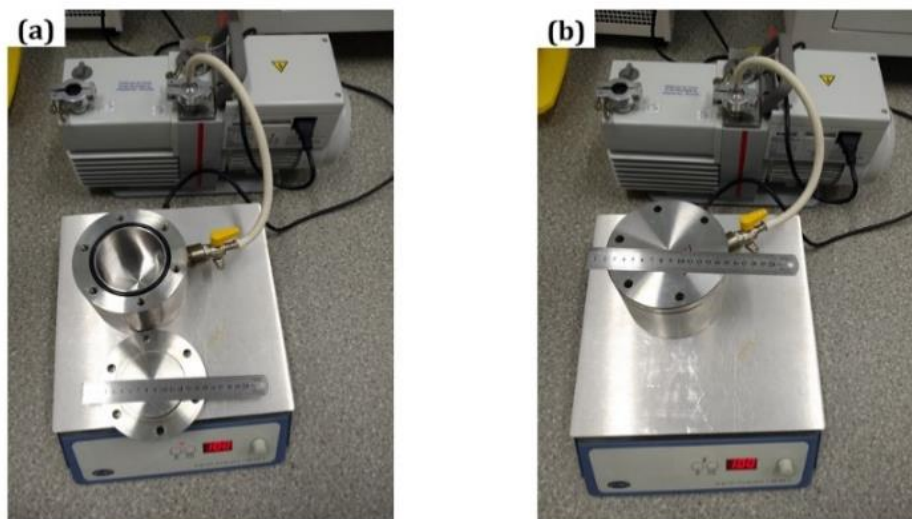

**Figure S1.** (a) and (b) the photograph of our new custom-built device for annealed blend film with the assistance of vacuum ( $\sim 10^{-1}$  Pa).

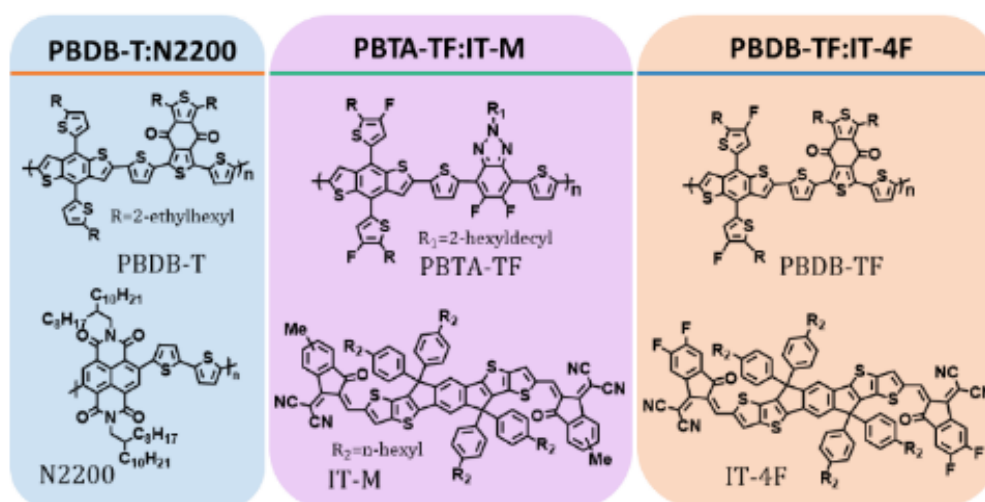

**Figure S2.** Molecular structures of polymer donors (PBDB-T, PBTA-TF and PBDB-TF) and non-fullerene acceptors (N2200, IT-M and IT-4F).

**Table S1.** The fabrication details of PSCs.

| Active layers | D/A ratio | Coating method | Polymer concentration (mg/ml) | Solvent           | Thickness (nm) | Ref. |
|---------------|-----------|----------------|-------------------------------|-------------------|----------------|------|
| PBDB-T: N2200 | 1:1       | Spin coating   | 10                            | CB/DIO (99.5/0.5) | 85             | [1]  |
|               |           | Blade coating  | 7                             |                   |                |      |

|                   |       |               |    |                      |     |     |
|-------------------|-------|---------------|----|----------------------|-----|-----|
| PBTA-TF: IT-M     | 1:1   | Spin coating  | 10 | XY/PN<br>(99.5/0.5)  | 110 | [2] |
|                   |       | Blade coating | 6  |                      |     |     |
| PTB7-Th: IEICO-4F | 1:1   | Spin coating  | 10 | CB/CN<br>(96/4)      | 124 | [3] |
|                   |       | Blade coating | 7  |                      |     |     |
| PBDB-TF: IT-4F    | 1:1.5 | Spin coating  | 10 | CB/DIO<br>(99.5/0.5) | 105 | [4] |
|                   |       | Blade coating | 6  |                      |     |     |

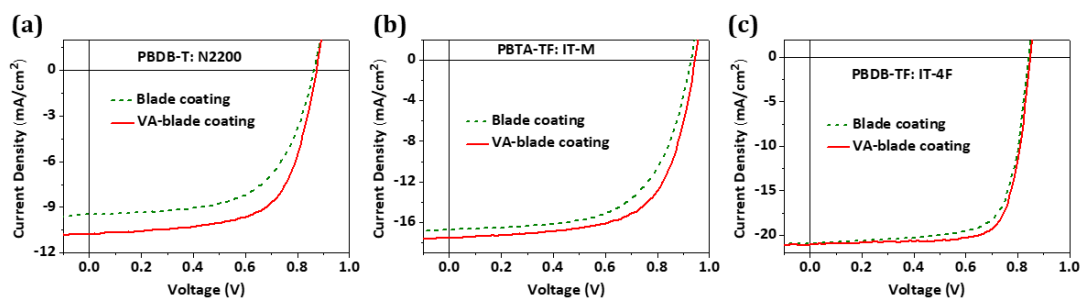

**Figure S3.** The  $J$ - $V$  curves of blade-coated PSCs based on (a) PBDB-T: N2200, (b) PBTA-TF:IT-M and (c) PBDB-TF:IT-4F blend film.

**Table S2.** The photovoltaic properties of PSCs based on PBDB-T: N2200, PBTA-TF: IT-M, and PBDB-TF: IT-4F blend film cast from spin coating method.

| Active layer   | $V_{oc}$ (V) | $J_{sc}$ (mA/cm <sup>2</sup> ) | FF   | PCE (%) | Ref. |
|----------------|--------------|--------------------------------|------|---------|------|
| PBDB-T: N2200  | 0.89         | 11.05                          | 0.66 | 6.49    | [1]  |
| PBTA-TF: IT-M  | 0.96         | 18.71                          | 0.70 | 12.57   | [2]  |
| PBDB-TF: IT-4F | 0.84         | 20.81                          | 0.76 | 13.29   | [4]  |

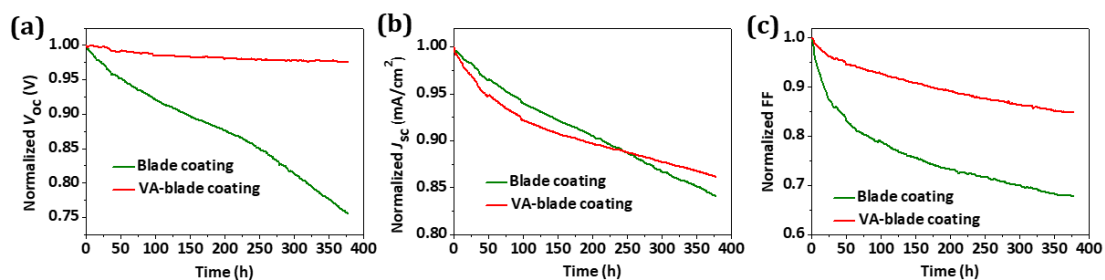

**Figure S4.** The normalized evolution of  $V_{oc}$  (a),  $J_{sc}$  (b), and FF (c) measured with

continuous testing under open circuit conditions in the air. The illumination source was white LEDs. The initial PCEs of the blade-coated PSCs based PBDB-TF: IT-4F with blade coating and VA-blade coating method were 12.25% and 13.48%, respectively.

**Table S3.** Photovoltaic performance of device module with an total area of 21 cm<sup>2</sup> based on PBDB-TF:IT-4F.

| Total area (cm <sup>2</sup> ) | $V_{oc}$ (V) | $J_{sc}$ (mA/cm <sup>2</sup> ) | FF    | PCE (%) |
|-------------------------------|--------------|--------------------------------|-------|---------|
| 21                            | 2.56         | 3.74                           | 64.02 | 6.13    |

#### References

- (1) L. Ye, X. Jiao, W. Zhao, S. Zhang, H. Yao, S. Li, H. Ade, J. Hou, *Chem. Mater.* **2016**, 28, 6178.
- (2) W. Zhao, S. Zhang, Y. Zhang, S. Li, X. Liu, C. He, Z. Zheng, J. Hou, *Adv. Mater.* **2018**, 30, 1704837.
- (3) X. Song, N. Gasparini, L. Ye, H. Yao, J. Hou, H. Ade, D. Baran, *ACS Energy Lett.* **2018**, 3, 669.
- (4) W. Li, L. Ye, S. Li, H. Yao, H. Ade, J. Hou, *Adv. Mater.* **2018**, 30, 1707170.
